# Supplementary material for: Transforming Growth Factor α Evokes Aromatase Expression in Gastric Parietal Cells during Rat Postnatal Development
Source: MDPI journal article supplement (doi:10.3390/ijms25042119), 2024-02-09
Supplement: s1 [file s1]

# Supplemental data

Figure S1

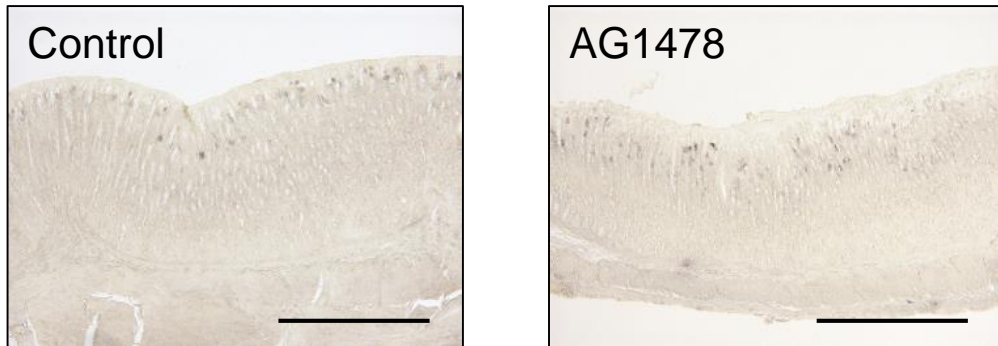

Light photomicrographs of the gastric mucosa of Control and AG1478 administration group at day 25 were immunostained with antibodies to TGF $\alpha$  under the same condition as outlined in the Materials and Methods section. TGF $\alpha$  expression is maintained in AG1478 administration group. Scale bars are provided to indicate 500  $\mu$ m.

Figure S2

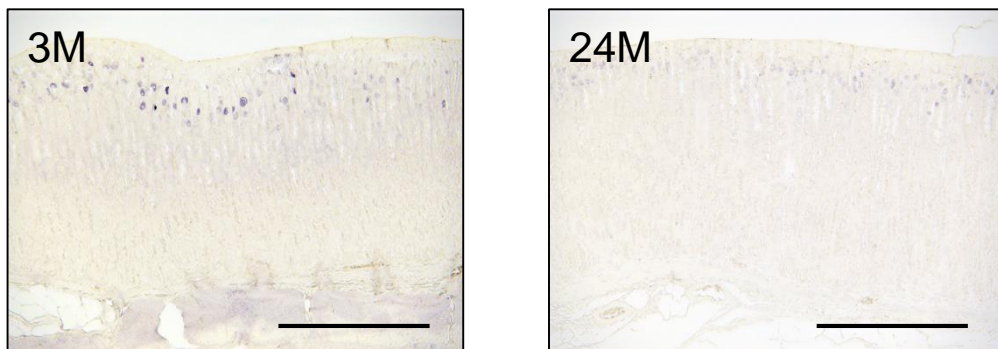

Light photomicrographs of the gastric mucosa of 3 months and 24 months old rat were immunostained with antibodies to TGF $\alpha$  under the same condition as outlined in the Materials and Methods section. Although TGF $\alpha$  expression was maintained at 3 months old, it was attenuated at 24 months old. Scale bars are provided to indicate 500  $\mu$ m.

# Supplemental data

Table S1.

The relative *Cyp19a1* mRNA content in the gastric mucosa at day 21

|                     | Control     | TGFα          |
|---------------------|-------------|---------------|
| <i>Cyp19a1</i> mRNA | 1.05 ± 0.36 | 3.25 ± 0.56 * |

The *Cyp19a1* mRNA expression of TGFα was higher than Control group. Primer sequences used were the following: aromatase (*Cyp19a1*, GenBank accession no. NM\_017085) forward, 5'-ATTGGCATGCACGAGAATGG-3'; reverse, 5'-TGCTGCTTGATGGATTCCAC-3'. n = 4, Mean ± S.D., \*:  $p < 0.05$ .

Table S2.

Estradiol concentrations in the portal vein at day 21

|                   | Control     | TGFα        |
|-------------------|-------------|-------------|
| Estradiol (pg/mL) | 6.95 ± 2.77 | 4.03 ± 4.18 |

There was no significant difference in the estradiol levels. n = 6, Mean ± S.D.
